# Supplementary material for: Cell Membrane-Coated Oil in Water Nano-Emulsions as Biomimetic Nanocarriers for Lipophilic Compounds Conveyance
Source: MDPI journal article supplement (doi:10.3390/pharmaceutics13071069), 2021-07-12
Supplement: s1 [file s1]

# Supplementary Materials: Cell Membrane-Coated Oil in Water Nano-Emulsions As Biomimetic Nanocarriers for Lipophilic Compounds Conveyance

Martina Profeta, Concetta Di Natale, Elena Lagreca, Valentina Mollo, Paolo Antonio Netti and Raffaele Vecchione

## Supplementary information

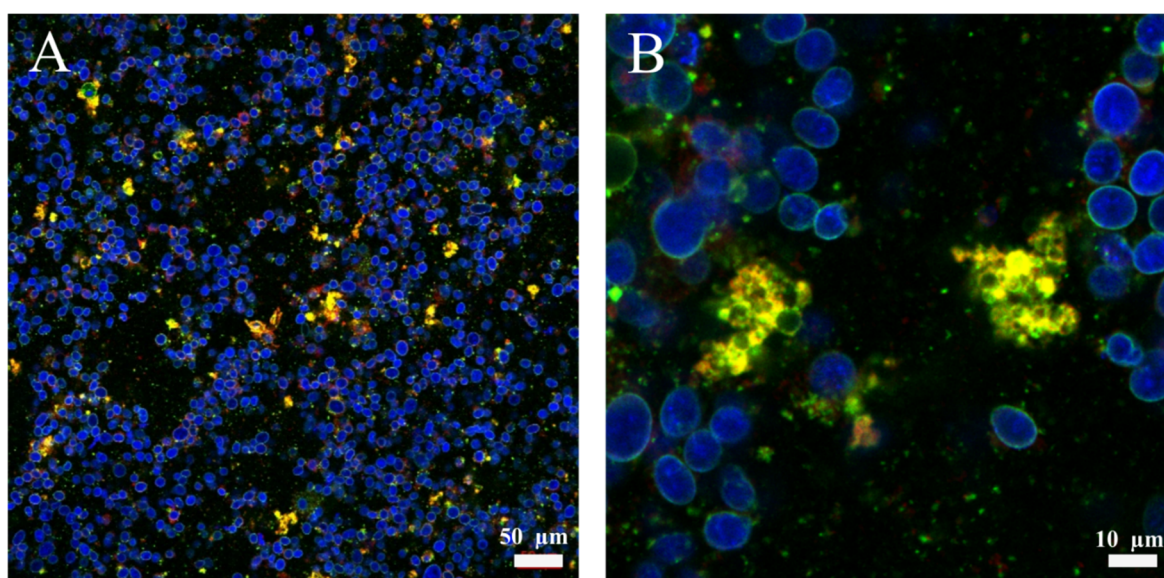

**Figure S1.** Cell nuclei (blue) contained in the first pellet of the purification process. Figure (B) is a zoom in of Figure (A).

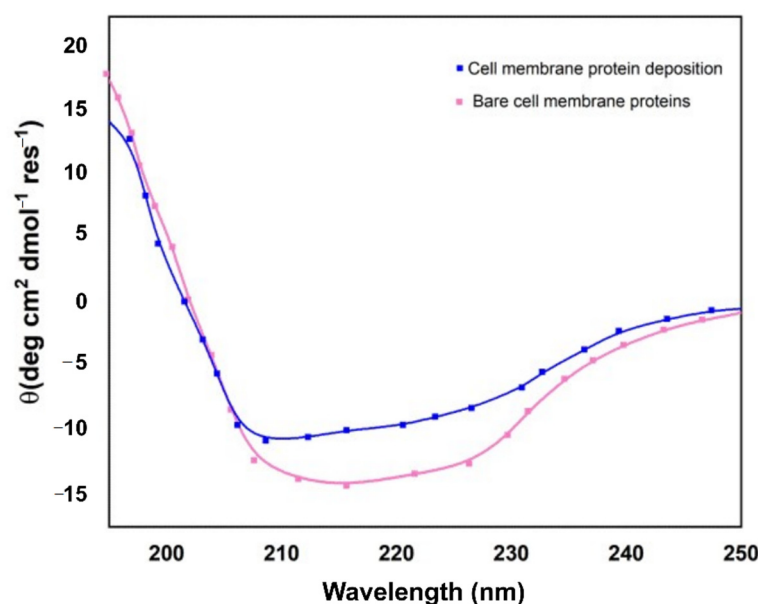

**Figure S2.** Overlay of CD spectra of: pink) bare membrane after extraction and purification processes (371.1 μg) and blue) cell membrane proteins deposited on Ct-NE (150 μg).

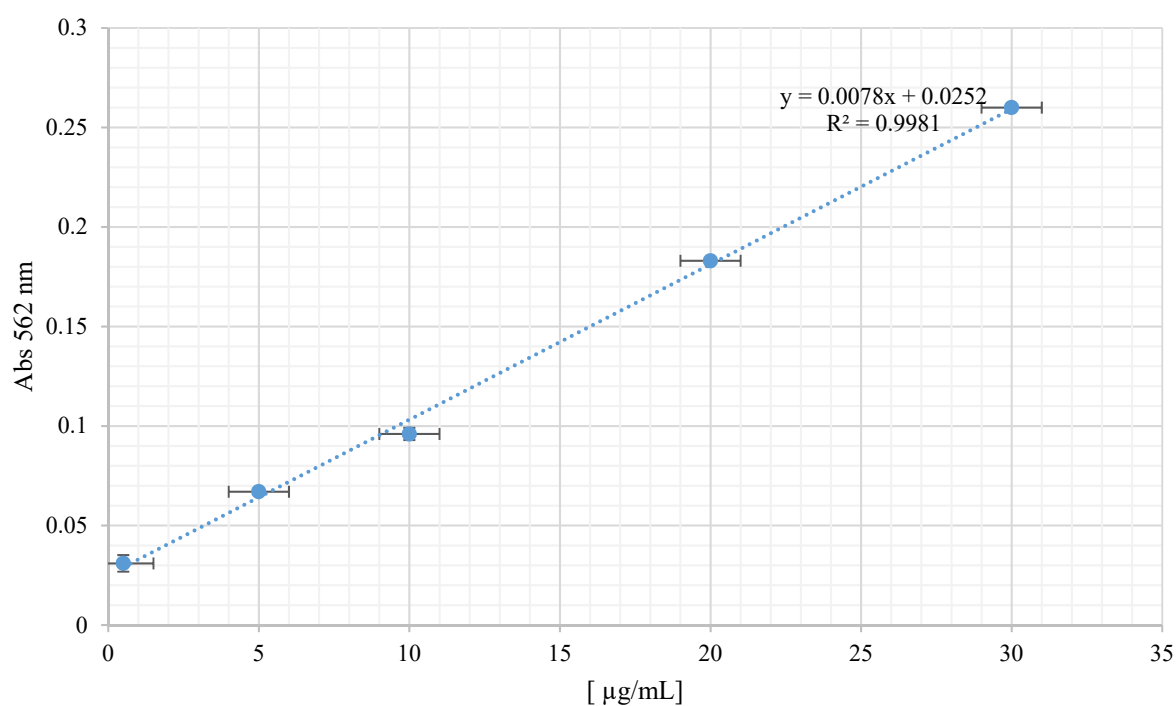

**Figure S3.** Cell membrane quantification by BCA assay. Titration curve.

**Table S1.** Size, PDI and  $\zeta$ -potential data of Ct-NEs and CM-NEsoSome.

| Samples     | Size /d. nm      | PDI               | $\zeta$ -potential / mV |
|-------------|------------------|-------------------|-------------------------|
| Ct-NEs      | $96.0 \pm 0.1$   | $0.119 \pm 0.02$  | $+38.0 \pm 1.2$         |
| CM-NEsoSome | $105.9 \pm 0.66$ | $0.088 \pm 0.013$ | $+31.8 \pm 0.88$        |

**Table S2.** Size and PDI of CM-NEsoSome over time obtained by DLS analysis. Data are expressed as mean  $\pm$  SD ( $n=3$ ).

| Time / days | Size /d. nm       | PdI               |
|-------------|-------------------|-------------------|
| 0           | $105.9 \pm 0.66$  | $0.088 \pm 0.013$ |
| 1           | $108.0 \pm 4.71$  | $0.086 \pm 0.02$  |
| 7           | $105.5 \pm 0.089$ | $0.089 \pm 0.010$ |
| 15          | $100.8 \pm 0.55$  | $0.082 \pm 0.09$  |
| 30          | $119.8 \pm 1.02$  | $0.118 \pm 0.017$ |

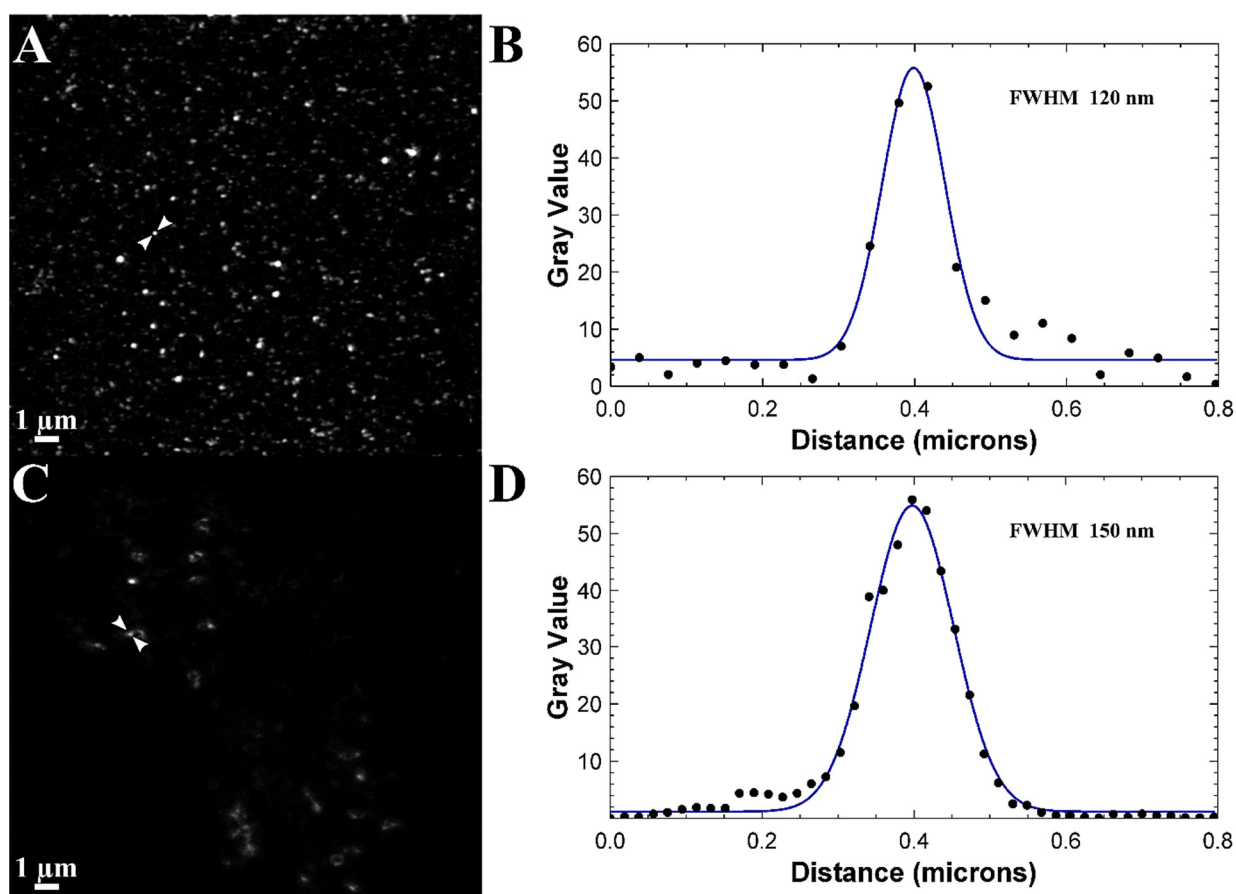

**Figure S4.** STED analysis of Ct-NE (A,B) and CM-NEsoSome (C,D). (A,C) STED images, (B,D) Deconvolution spectra analysis by ImageJ® software extracted respectively from images (A,C).

## ζ-potential distribution

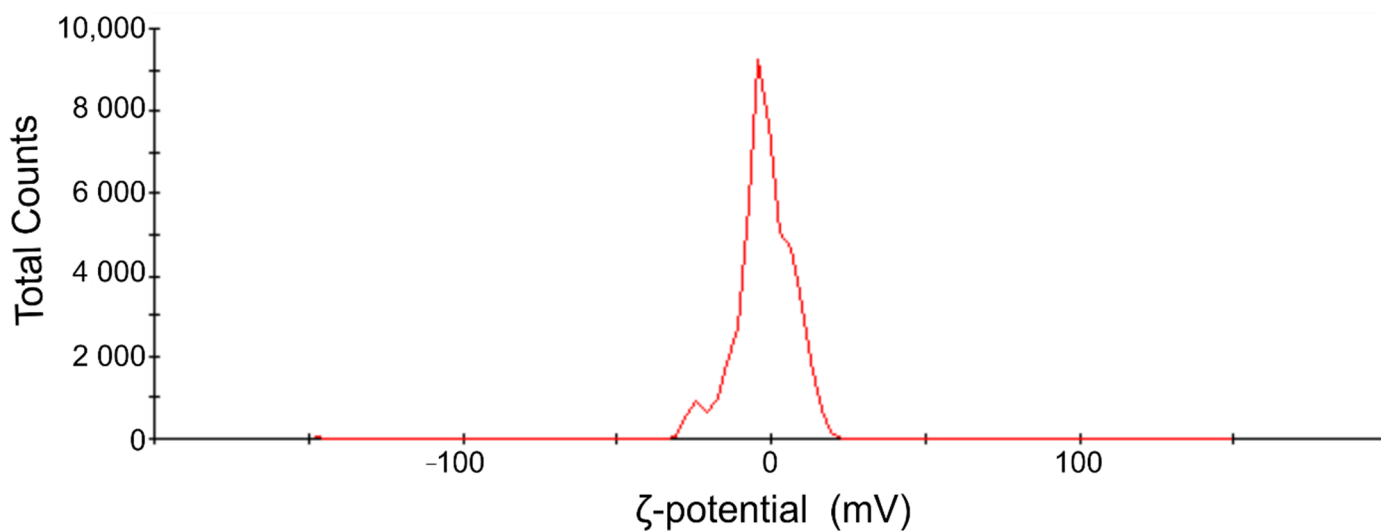

**Figure S5.** ζ-potential (mV) distribution of U87-MG cells.
